# Supplementary material for: Global stock structure of the Silky shark (Carcharhinus falciformis, Carcharhinidae) assessed with high-throughput DNA sequencing
Source: PeerJ. 2025 Jul 7;13:e19493. doi: 10.7717/peerj.19493 (PMC12244132; doi:10.7717/peerj.19493)
Supplement: Supplemental Information 1 [file peerj-13-19493-s001.xlsx]

## Sheet: Sheet1
Sample ID	Region	Lat	Long	Sample Date	Fork Length	Total Length	Sex
818 CFK	EPAC	-1.76667	-85.6333
819 CFK	EPAC	-0.7	-85.6833
826 CFK	EPAC	-0.354283	-85.2867
832 CFK	EPAC	-6.93263	-82.9813
841 CFK	EPAC	2.23608	-83.9538
842 CFK	EPAC	2.23608	-83.9538
843 CFK	EPAC	2.23608	-83.9538
844 CFK	EPAC	2.23608	-83.9538
845 CFK	EPAC	1.76243	-84.165
846 CFK	EPAC	1.9683	-83.8756
847 CFK	EPAC	-4.11615	-85.0635
848 CFK	EPAC	1.67617	-84.7253
851 CFK	EPAC	-4.73357	-85.2172
852 CFK	EPAC	-4.73357	-85.2172
853 CFK	EPAC	1.20567	-84.3237
854 CFK	EPAC	1.03933	-84.2383
855 CFK	EPAC	1.03933	-84.2383
856 CFK	EPAC	0.723283	-83.3987
857 CFK	EPAC	1.05568	-81.9173
859 CFK	EPAC	1.21967	-85.8618
860 CFK	EPAC	1.21967	-85.8618
861 CFK	EPAC	1.31867	-85.9318
862 CFK	EPAC	1.742	-84.2535
863 CFK	EPAC	1.742	-84.2535
864 CFK	EPAC	-0.0737333	-84.6333
865 CFK	EPAC	0.86455	-81.9596
866 CFK	EPAC	2.10835	-85.989
867 CFK	EPAC	1.75313	-85.6008
868 CFK	EPAC	-1.70518	-86.4047
869 CFK	EPAC	1.6578	-84.9266
870 CFK	EPAC	1.8227	-86.0332
871 CFK	EPAC	0.822833	-83.3587
872 CFK	EPAC	1.78513	-85.0482
873 CFK	EPAC	1.71788	-85.0308
874 CFK	EPAC	2.16405	-85.1287
875 CFK	EPAC	1.93133	-85.119
876 CFK	EPAC	2.00833	-83.7897
877 CFK	EPAC	0.92195	-85.0803
878 CFK	EPAC	1.70683	-84.2205
879 CFK	EPAC	1.55817	-84.204
880 CFK	EPAC	2.15317	-82.942
881 CFK	EPAC	3.4074	-83.6236
882 CFK	EPAC	4.1016	-83.3645
883 CFK	EPAC	3.85342	-84.9159
884 CFK	EPAC	1.42307	-83.3874
885 CFK	EPAC	2.17512	-85.1313
886 CFK	EPAC	2.2664	-84.8443
887 CFK	EPAC	1.33367	-85.855
888 CFK	EPAC	1.49267	-86.0053
889 CFK	EPAC	3.29898	-84.8006
890 CFK	EPAC	1.39008	-85.4373
891 CFK	EPAC	1.88095	-84.8234
892 CFK	EPAC	1.69768	-84.4408
893 CFK	EPAC	-0.437167	-84.4322
894 CFK	EPAC	-10.8849	-81.051
896 CFK	EPAC	1.47583	-85.7423
897 CFK	EPAC	1.27	-85.8893
898 CFK	EPAC	0.616717	-86.3484
899 CFK	EPAC	2.79898	-84.8246
900 CFK	EPAC	-5.97145	-86.2986
901 CFK	EPAC	-8.21733	-81.7913
902 CFK	EPAC	-11.1407	-85.924
903 CFK	EPAC	-5.62615	-85.4537
904 CFK	EPAC	-11.2098	-86.3748
905 CFK	EPAC	-9.12317	-84.7388
906 CFK	EPAC	-9.005	-84.5502
907 CFK	EPAC	-1.87182	-86.1362
817 CFK	EPAC	-1.81667	-85.7333
820 CFK	EPAC	-3.71825	-85.3917
824 CFK	EPAC	-0.953389	-85.0825
825 CFK	EPAC	-1.03744	-84.6149
830 CFK	EPAC	-7.71305	-82.156
831 CFK	EPAC	-7.71305	-82.156
835 CFK	EPAC	-1.21667	-82.7167
836 CFK	EPAC	-7.21677	-83.4728
837 CFK	EPAC	0.366333	-84.2113
850 CFK	EPAC	1.08845	-82.1119
895 CFK	EPAC	0.945467	-86.2455
908 CFK	EPAC	-3.3502	-84.7592
909 CFK	EPAC	-7.33333	-84.7167
1119 CFK	SCP	-10.965	-169.147
1120 CFK	SCP	-10.52	-169.852
1122 CFK	SCP	-13.26	-170.352
1123 CFK	SCP	-11.19	-169.94
1124 CFK	SCP	-11.02	-169.3
1126 CFK	SCP	-11.7483	-170.485
1127 CFK	SCP	-10.245	-169.875
1128 CFK	SCP	-10.19	-169.012
1129 CFK	SCP	-16.1117	-171.492
1132 CFK	SCP	-11.0983	-168.69
1133 CFK	SCP	-10.35	-169.888
1134 CFK	SCP	-10.245	-169.875
1135 CFK	SCP	-10.9417	-172.27
1137 CFK	SCP	-11.02	-169.3
1138 CFK	SCP	-15.53	-167.89
1141 CFK	SCP	-10.965	-169.147
1142 CFK	SCP	-12.2033	-168.98
1143 CFK	SCP	-13.0533	-169.572
1144 CFK	SCP	-11.2633	-171.942
1145 CFK	SCP	-15.48	-169.562
1146 CFK	SCP	-15.7017	-169.355
1147 CFK	SCP	-15.525	-169.595
1148 CFK	SCP	-11.08	-169.262
1149 CFK	SCP	-11.5833	-169.17
1151 CFK	SCP	-10.9983	-169.538
1152 CFK	SCP	-11.0267	-169.493
1153 CFK	SCP	-11.67	-169.902
1154 CFK	SCP	-15.645	-169.607
1155 CFK	SCP	-11.3467	-169.918
1156 CFK	SCP	-12.4633	-170.137
1159 CFK	SCP	-15.9283	-171.237
1160 CFK	SCP	-13.0933	-170.018
1161 CFK	SCP	-13.18	-168.268
1162 CFK	SCP	-16.01	-171.255
1163 CFK	SCP	-11.035	-169.405
1164 CKF	SCP	-13.3633	-170.167
1165 CFK	SCP	-10.9467	-169.768
1166 CFK	SCP	-11.0433	-169.16
1169 CFK	SCP	-10.9983	-169.538
1170 CFK	SCP	-12.3983	-170.323
1171 CFK	SCP	-13.1367	-168.612
1172 CFK	SCP	-12.365	-169.01
1173 CFK	SCP	-11.4283	-170.242
1179 CFK	SCP	-15.8483	-171.105
1180 CFK	SCP	-12.4133	-168.072
1181 CFK	SCP	-13.03	-167.485
1182 CFK	SCP	-13.1483	-169.932
1184 CFK	SCP	-10.4633	-169.958
1185 CFK	SCP	-13.1017	-170.432
1186 CFK	SCP	-10.245	-169.875
1189 CFK	SCP	-15.4333	-171.13
1209 CFK	SCP	-13.4233	-167.788
1210 CFK	SCP	-13.4233	-167.788
1211 CFK	SCP	-13.275	-167.787
1213 CFK	SCP	-11.3267	-169.935
1214 CFK	SCP	-11.3267	-169.935
1216 CFK	SCP	-10.3167	-168.723
1217 CFK	SCP	-10.3983	-168.832
1218 CFK	SCP	-13.2533	-169.46
1219 CFK	SCP	-13.2533	-169.46
1220 CFK	SCP	-13.1817	-169.285
1221 CFK	SCP	-12.1583	-168.44
1223 CFK	SCP	-12.89	-169.823
1224 CFK	SCP	-13.0383	-169.763
1225 CFK	SCP	-13.0383	-169.763
1226 CFK	SCP	-13.0383	-169.763
1227 CFK	SCP	-12.855	-170.202
951 CFK	NCP	15.945	-161.35
955 CFK	NCP	6.2883	-161.913
956 CFK	NCP	6.865	-161.308
957 CFK	NCP	6.65	-148.55
958 CFK	NCP	6.65	-148.567
959 CFK	NCP	19.1333	-156.25
966 CFK	NCP	18.0333	-155.067
967 CFK	NCP	9.43333	-149.633
968 CFK	NCP	9.51667	-150.983
969 CFK	NCP	9.38333	-149.683
972 CFK	NCP	9.36667	-149.7
977 CFK	NCP	7.93333	-155.083
978 CFK	NCP	7.88333	-155.15
979 CFK	NCP	9.45	-156.017
981 CFK	NCP	9.5	-155.983
984 CFK	NCP	11.4	-166.705	14/14/2014	104		f
985 CFK	NCP	9.2967	-165.072	2013-09-02	74		M
986 CFK	NCP	13.02	-165.217	14/03/2013	132		F
987 CFK	NCP	13.565	-163.748	14/01/2013	120		F
988 CFK	NCP	11.2167	-166.66	2013-01-04	84		M
989 CFK	NCP	6.08444	-164.001	2014-06-05	67		m
990 CFK	NCP	6.18333	-163.867	2014-06-09	127		M
991 CFK	NCP	6.095	-163.97	2014-06-14	124		M
1119 CFK	NCP	4.6617	-163.183
1120 CFK	NCP	12.3417	-165.822
1121 CFK	NCP	13.4683	-165.747
1122 CFK	NCP	12.9483	-165.122	19/04/2013			F
1123 CFK	NCP	11.9358	-167.702	13/04/2013			F
1124 CFK	NCP	10.5178	-169.284
1228 CFK	NCP	14.9	-156.453		89		F
1229 CFK	NCP	17.6483	-160.327		81		F
1230 CFK	NCP	16.45	-158.248		99		M
1232 CFK	NCP	15.5917	-157.482		95		F
1233 CFK	NCP	12.0783	-165.545		128		M
1234 CFK	NCP	15.8633	-159.492		81		M
1235 CFK	NCP	16.45	-158.248		110		F
1236 CFK	NCP	17.8317	-160.527		83		F
1237 CFK	NCP	7.4083	-165.785		90		F
1238 CFK	NCP	17.3667	-156.243		121		F
1239 CFK	NCP	11.2733	-166.648		162		F
1240 CFK	NCP	11.5733	-168.365		88		M
1241 CFK	NCP	5.2083	-164.355		63		F
1242 CFK	NCP	4.7317	-164.135		119		F
1243 CFK	NCP	16.755	-155.127		173		F
1244 CFK	NCP	5.2083	-164.355		87		M
1245 CFK	NCP	17.425	-161.882		86		F
1246 CFK	NCP	17.425	-161.882		72		F
1247 CFK	NCP	17.21	-161.585		84		M
1248 CFK	NCP	15.2417	-165.008		81		M
1249 CFK	NCP	13.5417	-165.158		94		M
1250 CFK	NCP	13.2167	-170.65		94		F
1251 CFK	NCP	13.425	-165.03		111		F
1252 CFK	NCP	12.91	-170.928		78		M
1253 CFK	NCP	13.2167	-170.65		96		M
1254 CFK	NCP	15.8033	-160.833		185		F
1255 CFK	NCP	17.2017	-153.895		82		M
1256 CFK	NCP	13.2167	-170.65		90		M
1257 CFK	NCP	16.6283	-163.997		106		M
1258 CFK	NCP	14.985	-157.717		164		F
1259 CFK	NCP	12.5217	-169.562		88		M
1260 CFK	NCP	13.2167	-170.65		62		M
1261 CFK	NCP	16.285	-163.723		104		M
1262 CFK	NCP	16.285	-163.723		102		M
1264 CFK	NCP	13.5333	-162.817		144		F
1265 CFK	NCP	19.21	-163.083		176		F
1266 CFK	NCP	11.7267	-168.605
1267 CFK	NCP	15.5133	-165.162
1268 CFK	NCP	11.7267	-168.605		148		F
1269 CFK	NCP	14.9317	-164.302		92		F
1228 CFK	PNG	-3.86667	152.317	2014-05-16	160		F
1229 CFK	PNG	-3.86667	152.317	2014-05-16	206		F
1230 CFK	PNG	-3.86667	152.317	2014-05-16	224		F
1232 CFK	PNG	-5.43333	152.683	2014-05-22	192		F
1233 CFK	PNG	-5.8	151.883	2014-06-26	104		M
1234 CFK	PNG	-5.8	151.883	2014-06-26	104		F
1235 CFK	PNG	-5.8	151.883	2014-06-26	162		F
1236 CFK	PNG	-5.8	151.883	2014-06-26	106		F
1237 CFK	PNG	-5.8	151.883	2014-06-26	96		F
1238 CFK	PNG	-3.66667	152.817	2014-06-06	110		M
1239 CFK	PNG	-4.83333	153.183	2014-06-10	193		F
1240 CFK	PNG	-4.45	154.1	2014-06-23	182		M
1241 CFK	PNG	-3.91667	153.5	2014-06-08	147		F
1243 CFK	PNG	-4.83333	153.183	2014-06-10	158		M
1244 CFK	PNG	-3.91667	153.5	2014-06-08	146		M
1246 CFK	PNG	-3.91667	153.5	2014-06-08	183		M
1247 CFK	PNG	-6.7	154.7	2014-06-15	109		M
1248 CFK	PNG	-3.66667	152.817	2014-06-06	188		F
1249 CFK	PNG	-4.83333	153.183	2014-06-10	143		M
1250 CFK	PNG	-3.91667	153.5	2014-06-08	69		M
1251 CFK	PNG	-6.7	154.7	2014-06-15	80		F
1252 CFK	PNG	-4.83333	153.183	2014-06-10	104		M
1253 CFK	PNG	-5.08333	152.567	2014-06-29	102		M
1254 CFK	PNG	-5.35	152.983	2014-06-25	192		F
1256 CFK	PNG	-3.93333	153.417	2014-06-09	118		F
1257 CFK	PNG	-5.66667	154.267	2014-06-12	184		M
1258 CFK	PNG	-5.35	152.983	2014-06-25	148		F
1259 CFK	PNG	-5.08333	152.567	2014-06-29	188		F
1261 CFK	PNG	-5.66667	154.267	2014-06-12	122		M
1262 CFK	PNG	-5.35	152.983	2014-06-25	109		F
1263 CFK	PNG	-5.08333	152.567	2014-06-29	103		M
1264 CFK	PNG	-5.66667	154.267	2014-06-12	183		F
1266 CFK	PNG	-5.08333	152.567	2014-06-29	143		F
1267 CFK	PNG	-3.93333	153.417	2014-06-09	186		F
1268 CFK	PNG	-5.23333	152.3	2014-06-28	185		F
1270 CFK	PNG	-6.25	154.567	2014-06-19	119		F
1271 CFK	PNG	-5.55	154.1	2014-06-11	107		F
1272 CFK	PNG	-6.25	154.567	2014-06-19	135		M
1273 CFK	PNG	-5.75	151.833	2014-06-27	149		F
1274 CFK	PNG	-6.35	154.517	2014-06-18	127		M
1275 CFK	PNG	-5.55	154.1	2014-06-11	190		M
1277 CFK	PNG	-5.75	151.833	2014-06-27	134		M
1278 CFK	PNG	-6.35	154.517	2014-06-18	195		F
1279 CFK	PNG	-5.55	154.1	2014-06-11	174		F
1280 CFK	PNG	-4.83333	153.183	2014-06-10	158		M
1281 CFK	PNG	-6.25	154.567	2014-06-19	121		F
1282 CFK	PNG	-5.75	151.833	2014-06-27	112		F
1283 CFK	PNG	-6.83333	154.467	2014-06-16	134		M
1284 CFK	PNG	-6.58333	154.433	2014-06-17	155		M
1285 CFK	PNG	-5.75	151.833	2014-06-27	160		F
1286 CFK	PNG	-6.58333	154.433	2014-06-17	112		M
1287 CFK	PNG	-5.23333	152.3	2014-06-28	138		F
1288 CFK	PNG	-5.75	151.833	2014-06-27	147		F
1289 CFK	PNG	-5.55	154.1	2014-06-11	105		M
1290 CFK	PNG	-6.58333	154.433	2014-06-17	139		F
1291 CFK	PNG	-6.25	154.567	2014-06-19	138		M
1292 CFK	PNG	-3.88333	153.617	2014-06-07	120		F
1293 CFK	PNG	-6.58333	154.433	2014-06-17	164		F
1294 CFK	PNG	-6.83333	154.467	2014-06-16	160		M
1295CFK	PNG	-6.58333	154.433	2014-06-17	185		M
1296 CFK	PNG	-6.83333	154.467	2014-06-16	130		F
1297 CFK	PNG	-3.88333	153.617	2014-06-07	130		F
1298 CFK	PNG	-3.63333	148.05	2014-05-04	172		F
1299 CFK	PNG	-3.15	147.2	2014-05-07	241		M
1300 CFK	PNG	-3.63333	148.05	2014-05-04	130		F
1301 CFK	PNG	-3.63333	148.05	2014-05-04	230		M
1302 CFK	PNG	-3.63333	148.05	2014-05-04	138		F
1303 CFK	PNG	-3.63333	148.05	2014-05-04	106		M
1304 CFK	PNG	-3.15	147.2	2014-05-07	247		F
1305 CFK	PNG	-4.58333	147.467	2014-05-13	228		F
1306 CFK	PNG	-4.58333	147.467	2014-05-13	198		M
1319 CFK	PNG	-10.9667	149.233	2015-08-22	131		F
1320 CFK	PNG	-10.6	153.783	2015-08-24	153		F
1321 CFK	PNG	-12.05	150.883	2015-08-28	212		F
763 CFK	TAI	24.33	121.54
764 CFK	TAI	21.46	121.2
765 CFK	TAI	21.46	121.2
766 CFK	TAI	21.46	121.2
767 CFK	TAI	21.46	121.2
768 CFK	TAI	21.46	121.2
769 CFK	TAI	21.46	121.2
770 CFK	TAI	21.46	121.2
771 CFK	TAI	21.46	121.2
772 CFK	TAI	21.46	121.2
773 CFK	TAI	21.46	121.2
774 CFK	TAI	21.46	121.2
775 CFK	TAI	21.46	121.2
776 CFK	TAI	23.15	121.25
777 CFK	TAI	23.15	121.25
778 CFK	TAI	23.15	121.25
779 CFK	TAI	22.01	121.38
780 CFK	TAI	22.05	121.4
781 CFK	TAI	23.05	121.24
782 CFK	TAI	23.05	121.24
783 CFK	TAI	23.05	121.24
784 CFK	TAI	22.31	121.39
785 CFK	TAI	22.16	121.2
786 CFK	TAI	22.16	121.2
788 CFK	TAI	22.16	121.2
789 CFK	TAI	22.16	121.2
790 CFK	TAI	20.58	121.53
791 CFK	TAI	20.58	121.53
792 CFK	TAI	22.3	121.4
793 CFK	TAI	22.3	121.4
794 CFK	TAI	22.3	121.4
795 CFK	TAI	22.3	121.4
796 CFK	TAI	21.24	121.26
797 CFK	TAI	23.25	121.48
798 CFK	TAI	22.28	121.26
799 CFK	TAI	22.2	121.46
801 CFK	TAI	22.2	121.46
802 CFK	TAI	22.2	121.46
803 CFK	TAI	22.33	121.34
804 CFK	TAI	22.33	121.34
805 CFK	TAI	20.58	121.53
806 CFK	TAI	23.04	121.34
807 CFK	TAI	23.04	121.34
809 CFK	TAI	23.04	121.34
811 CFK	TAI	23.17	121.28
812 CFK	TAI	23.17	121.28
813 CFK	TAI	23.05	121.33
600 CFK	IDO	-0.409	64.1167	2009-12-23	110.3	133.7	M
601 CFK	IDO	-4.66667	62.75	2009-12-22	88.8	109.5	M
602 CFK	IDO	-4.46667	69.65	2009-12-25	105.3	127.4	F
603 CFK	IDO	-4.55	70.1667	2009-12-26	88.9	110.4	M
604 CFK	IDO	-4.9	64.1167	2009-12-23	122.8	145.9	M
605 CFK	IDO	-4.28333	64.2667	2009-12-23	81.4	100.4	M
606 CFK	IDO	-4.66667	62.75	2009-12-22	87.4	107.8	F
607 CFK	IDO	-4.66667	62.75	2009-12-22	89.6	109.4	M
608 CFK	IDO	-4.55	70.1667	2009-12-26	87.2	107.1	M
609 CFK	IDO	-4.7	59.9667	-	150	177	M
610 CFK	IDO	-4.7	59.9667	-	153.5	182	F
611 CFK	IDO	-4.76667	59.9833	2010-01-13	116.3	145.7	M
612 CFK	IDO	-8.03333	46.35	2010-01-06	87.5	107.2	F
613 CFK	IDO	-3.21667	48.0667	2010-01-14	92	113.6	F
614 CFK	IDO	-0.933333	56.1	2010-01-10	86.9	104.2	M
615 CFK	IDO	-5.45	58.3333	2010-01-12	117.2	143.4	F
616 CFK	IDO	-2.58333	52.7167	2010-01-13	76.5	93	F
617 CFK	IDO	-1.58333	66.15	2009-12-31	77.8	96.2	F
618 CFK	IDO	-1.61667	62.5	2010-01-07	88.9	110	M
619 CFK	IDO	-2.21667	55.65	2010-01-04	62.2	78.1	F
620 CFK	IDO	-1.13333	56.05	2010-01-11	86.9	109.7	M
621 CFK	IDO	-8.4	46.6	2010-01-06	77.8	95.2	F
622 CFK	IDO	0.5	59.75	2009-12-30	92.3	112.3	M
623 CFK	IDO	-0.866667	51.9667	2010-01-12	81.5	100	F
624 CFK	IDO	-5.5	55.4667	2010-01-02	95.6	116.8	F
625 CFK	IDO	1.5	55.9833	2010-01-09	83.7	101.9	F
626 CFK	IDO	1.48333	58.05	2010-01-08	59.8	74.4	F
627 CFK	IDO	-3.51667	55.0833	2010-01-17	85.7	103	F
628 CFK	IDO	-8.03333	46.35	2010-01-06	78.9	98.6	F
629 CFK	IDO	-9.65	48.9667	2010-01-08	110.6	124.3	M
630 CFK	IDO	-5.05	59.7333	2010-01-13	85.3	103.7	F
631 CFK	IDO	-6.56667	51.8167	2010-12-03	103.5	129.9	F
632 CFK	IDO	0.4	56.2167	2009-12-29	74.5	91.2	M
633 CFK	IDO	-1.31667	51.15	2010-01-24	111.3	136	M
634 CFK	IDO	-3	49.2667	2010-01-26	90	109.5	F
635 CFK	IDO	-3	49.2667	2010-01-26	74.7	93	M
636 CFK	IDO	-6.55	58.2333	2010-02-01	56	71.1	M
637 CFK	IDO	-6.55	58.2333	2010-02-02	71.9	89.5	M
638 CFK	IDO	-6.55	58.2333	2010-02-01	100.3	122.6	F
639 CFK	IDO	-3.81667	53.7333	2010-02-04	84.9	106.5	F
640 CFK	IDO	-3.81667	53.7333	2010-02-04	90.8	111	M
641 CFK	IDO	-6.55	58.2333	2010-02-01	101.9	127.5	F
642 CFK	IDO	-6.55	58.2333	2010-02-02	58.4	72.6	F
643 CFK	IDO	-7.98333	49.4667	2010-01-09	160	192.5	M
644 CFK	IDO	-3.08333	50.8833	2010-01-19	135	165.5	M
645 CFK	IDO	-3.08333	50.8833	2010-01-19	122.3	149	F
646 CFK	IDO	-9.08333	55.1667	2010-01-10	105.6	136.5	F
647 CFK	IDO	-9.71667	48.65	2010-01-08	99	122.4	F
648 CFK	IDO	-6.85	52.4	2010-01-19	79.4	99.4	M
649 CFK	IDO	-7.01667	58.7167	2010-02-02	60	73.5	F
650 CFK	IDO	-4.05	51.1167	2010-01-22	72.1	89.4	M
651 CFK	IDO	-7.01667	58.7167	2010-02-02	56.7	70	F
652 CFK	IDO	-3.88333	53.7	2010-02-05	55.5	68.8	M
653 CFK	IDO	-6.11667	45.0167	2010-02-27	101.8	124.6	F
654 CFK	IDO	-6.23333	53.6	2010-03-10	103.6	128.9	M
655 CFK	IDO	-5.43333	48.7667	2010-03-07	103.3	124.7	F
656 CFK	IDO	-5.66667	47.4167	2010-02-25	98.6	123.1	M
657 CFK	IDO	-6.11667	45.0167	2010-02-27	87.5	106.5	M
658 CFK	IDO	-6.5	44.6333	2010-02-28	90.3	109.2	F
659 CFK	IDO	-6.23333	53.6	2010-03-10	85.4	104.5	M
660 CFK	IDO	-5.43333	48.7667	2010-03-07	71.6	79.1	M
661 CFK	IDO	-5.43333	48.7667	2010-03-07	59.3	72.9	F
662 CFK	IDO	-6.5	44.6333	2010-02-28	66	82.6	M
663 CFK	IDO	-14.2	44.8	-	116.4	138.7	F
664 CFK	IDO	-19.6333	41.4667	-	80.2	99.3	F
665 CFK	IDO	-5.75	57.9167	2010-05-16	99.1	123.8	F
666 CFK	IDO	-10.6333	56.15	2010-05-27	107.4	135.2	F
667 CFK	IDO	-7.43333	63.4833	2010-05-17	108.8	132.3	F
668 CFK	IDO	-3.86667	49.7667	2010-06-04	84.3	104.3	F
669 CFK	IDO	-8.31667	62.2667	2010-05-24	89.8	112.4	F
670 CFK	IDO	-5.18333	49.8	2010-06-08	87.1	107.9	M
671 CFK	IDO	-7.41667	63.55	2010-05-18	96	117.3	M
672 CFK	IDO	-3.73333	50.2667	2010-06-14	80.6	101.6	F
673 CFK	IDO	-8.2	63.15	2010-05-19	79.6	89.5	M
674 CFK	IDO	-12.5167	66.0333	2010-11-29	91.1	111.7	M
675 CFK	IDO	-5.41667	60	2010-11-15	114.1	142	M
676 CFK	IDO	-10.45	67.55	2010-11-27	90.2	107	F
677 CFK	IDO	-7.33333	52.0667	2009-11-28	129	162	M
678 CFK	IDO	-0.3	61.2833	2009-11-26	67.4	84.2	F
679 CFK	IDO	-2.16667	52.55	2009-11-16	84.9	102.5	M
680 CFK	IDO	-5.35	58.05	-	111.5	144.5	F
681 CFK	IDO	-5.16667	54.3333	2009-12-16			F
682 CFK	IDO	-8.23333	67.3167	2009-11-26	110	136	F
683 CFK	IDO	-5.46667	57.8167	2009-11-28	85.2	67.5	F
684 CFK	IDO	-4.73333	67.35	2009-11-20	89.5	106.5	F
685 CFK	IDO	-8.63333	54.0667	2009-11-27	137.5	169	F
686 CFK	IDO	-8.68333	54.3167	2009-11-27	139.5	171	F
687 CFK	IDO	-5.86667	58.45	2009-12-13	124	146.5	F
688 CFK	IDO	-8.83333	63.55	2009-11-26	99	123.1	F
689 CFK	IDO	-5.86667	58.45	2009-12-03	93.4	116.5	M
690 CFK	IDO	-4.11667	69.1333	2009-12-18	85.3	109.2	F
691 CFK	IDO	-4.78333	62.4667	2009-12-06	76.1	95.2	F
692 CFK	IDO	-6.08333	58.4167	2009-11-29	70.9	85.5	F
693 CFK	IDO	-2.6	60.1333	2009-11-27	89.4	111.5	F
694 CFK	IDO	-4.21667	68.8333	2009-12-08	81.5	98.6	M
695 CFK	IDO	-3.96667	63.75	2009-12-07	67.4	84.2	M
696 CFK	IDO	-5.13333	57.9167	2009-11-28	112.9	139.7	F
697 CFK	IDO	-10.4333	50.5	2009-12-18	87.4	106.6	F
698 CFK	IDO	-10.4333	50.5	2009-12-18	92.3	102.5	F
699 CFK	IDO	-10.4333	50.5	2009-12-18	97.7	123.4	M
700 CFK	IDO	3.23333	66.9667	2009-11-24	113.4	138.8	M
701 CFK	IDO	-10.4333	50.5	2009-12-18	93	111.4	F
702 CFK	IDO	-10.4333	50.5	2009-12-18	102.1	127.2	F
703 CFK	IDO	-11.95	66.0667	2010-11-29	92.2	115.8	M
704 CFK	IDO	-11.95	66.0667	2010-11-29	101.1	127.3	F
934 CFK	AFR	10.4342	-18.4353
935 CFK	AFR	8.65111	-17.6014
936 CFK	AFR	8.65111	-17.6014
937 CFK	AFR	8.65111	-17.6014
938 CFK	AFR	8.17444	-17.9502
939 CFK	AFR	8.17444	-17.9502
940 CFK	AFR	8.17268	-17.949
941 CFK	AFR	8.17268	-17.949
942 CFK	AFR	8.15	-18.0003
943 CFK	AFR	5.73472	-15.1681
944 CFK	AFR	5.73472	-15.1681
945 CFK	AFR	8.19694	-17.5648
946 CFK	AFR	8.74862	-17.9906
947 CFK	AFR	8.75221	-17.9877
948 CFK	AFR	8.75221	-17.9877
949 CFK	AFR	8.7549	-17.9873
950 CFK	AFR	10.4371	-18.4444
1322 CFK	AFR			2016-03-17	122	146
1323 CFK	AFR			2016-03-17	78	96
1324 CFK	AFR			2016-03-19	116	139
1325 CFK	AFR	6.42	-12.48	2016-03-28	110	unk
1326 CFK	AFR	6.42	-12.48	2016-03-28	132	155
1327 CFK	AFR	6.42	-12.48	2016-03-28	167	unk
1328 CFK	AFR	6.42	-12.48	2016-03-28	130	unk
1329 CFK	AFR	6.42	-12.48	2016-03-28	119	142
1330 CFK	AFR	6.42	-12.48	2016-03-28	77	97
1331 CFK	AFR	6.42	-12.48	2016-03-28	67	83
1332 CFK	AFR	5.5	-14.22	2016-04-01	73	unk
1333 CFK	AFR	5.5	-14.22	2016-04-01	71	unk
1334 CFK	AFR	5.5	-14.22	2016-04-01	90	unk
1335 CFK	AFR	5.5	-14.22	2016-04-01	76	unk
1336 CFK	AFR	5.5	-14.22	2016-04-01	103	unk
1337 CFK	AFR	5.5	-14.22	2016-04-01	75	unk
1338 CFK	AFR	5.5	-14.22	2016-04-01	107	unk
1339 CFK	AFR	5.5	-14.22	2016-04-01	93	unk
1340 CFK	AFR	5.5	-14.22	2016-04-01	68	unk
1341 CFK	AFR	5.5	-14.22	2016-04-01	85	107
1342 CFK	AFR	5.5	-14.22	2016-04-01	112	140
1343 CFK	AFR	5.5	-14.22	2016-04-01	103	131
1344 CFK	AFR	5.5	-14.22	2016-04-01	123	149
1345 CFK	AFR	5.5	-14.22	2016-04-01	98	113
1346 CFK	AFR	5.5	-14.22	2016-04-01	58	77
1347 CFK	AFR	5.5	-14.22	2016-04-01	109	138
1348 CFK	AFR	5.5	-14.22	2016-04-01	119	143
1349 CFK	AFR	5.5	-14.22	2016-04-01	73	88
1350 CFK	AFR	5.5	-14.22	2016-04-01	119	142
1351 CFK	AFR	5.5	-14.22	2016-04-01	119	147
1352 CFK	AFR	7.29	-14.49	2016-04-02	120	128
1353 CFK	AFR	7.29	-14.49	2016-04-02
1354 CFK	AFR	7.29	-14.49	2016-04-02	83	98
1355 CFK	AFR	7.29	-14.49	2016-04-02	108	134
1356 CFK	AFR	7.29	-14.49	2016-04-02	105	127
1357 CFK	AFR	7.29	-14.49	2016-04-02	120	150
1358 CFK	AFR	7.29	-14.49	2016-04-02	131	159
1359 CFK	AFR	7.29	-14.49	2016-04-02	200
1360 CFK	AFR	10.24	-18.44	2016-04-04	91	112
1361 CFK	AFR	10.23	-18.44	2016-04-05	200	unk
1362 CFK	AFR	10.23	-18.44	2016-04-05	78	97
1363 CFK	AFR	10.23	-18.44	2016-04-05	84	103
1364 CFK	AFR	10.23	-18.44	2016-04-05	128	148
1365 CFK	AFR	10.23	-18.44	2016-04-05	143	unk
1366 CFK	AFR	10.23	-18.44	2016-04-05	118	142
1367 CFK	AFR	10.23	-18.44	2016-04-05	139	unk
1368 CFK	AFR	10.23	-18.44	2016-04-05	unk	unk
1369 CFK	AFR	10.23	-18.44	2016-04-05	107	134
1370 CFK	AFR	10.23	-18.44	2016-04-05	106	128
1371 CFK	AFR	10.23	-18.44	2016-04-05	99	120
1372 CFK	AFR	10.23	-18.44	2016-04-05	119	144
1373 CFK	AFR	10.23	-18.44	2016-04-05	141	unk
1374 CFK	AFR	10.23	-18.44	2016-04-05	138	unk
1375 CFK	AFR	10.23	-18.44	2016-04-05	136	unk
1376 CFK	AFR	10.23	-18.44	2016-04-05	109	unk
1377 CFK	AFR	10.23	-18.44	2016-04-05	106	127
1378 CFK	AFR	10.23	-18.44	2016-04-05	124	150
1379 CFK	AFR	10.23	-18.44	2016-04-05	69	83
1380 CFK	AFR			2016-04-07	unk	131
1381 CFK	AFR			2016-04-07	unk	107
